# Supplementary material for: A Polynucleotide Repeat Expansion Causing Temperature-Sensitivity Persists in Wild Irish Accessions of Arabidopsis thaliana
Source: Front Plant Sci. 2016 Aug 31;7:1311. doi: 10.3389/fpls.2016.01311 (PMC5006647; doi:10.3389/fpls.2016.01311)
Supplement: Table S5 — Genotype results from 22 SSLP markers distributed throughout the genome. [file Table5.XLSX]

## Sheet: Sheet1
Chr	Marker	Position (bps)	Forward primer	Reverse primer	PCR product size in Bur-0 (bps)	PCR product size in Col-0 (bps)	PCR product size in At322 +/-iil (bps)
I	nga59	8642	GCATCTGTGTTCACTCGCC	TTAATACATTAGCCCAGACCCG	120	100	110
I	F5114	24370345	CTGCCTGAAATTGTCGAAAC	GGCATCACAGTTCTGATTCC	305	220	300
II	MSat2.5	208179	TGAGAGGGACAGATAGGAA	ATCAAAGGGATACTGACAA	50	100	75
II	F504-3	512733	GAATGTTTTGAAGGATATCTCAG	GAAAAATGGAGCCACGAAATAAGC	200	300	200
II	T10J7-T7	4851327	TCTCTGTGCTTTCTCTTTCCTGAC	GCAATGCTACCGCTCTGATAG	500	300	500
II	LUGSSLP531	5172823	CTGGTTTTGGACATTAACAGCAA	CAAGATGATGATGACGATGAGGAT	100	100	75
II	LUGSSLP765	7228683	GGATGTGAGATTACTGCACAAGGAT	ACGAAGAGTGACAATGGTTGGA	150	150	150
II	SKB 677/678	8090763	ACGGATCGAAGTGGGTATTC	AGCTGCTCAAGGAAAAGCTG	1000	800	1000
II	SKB 600/601	8111803	TTTGAAAGGAGGGTTTGCGTTAGA	AGCTTGCCAAAGGAAAGTGA	300	300	300
II	Msat2.11	8220744	GATTTAAAAGTCCGACCTA	CCAAAGAGTTGTGCAA	275	300	275
II	Msat2.36	8678440	GATCTGCCTCTTGATCAGC	CCAAGAACTCAAAACCGTT	200	175	200
II	PLS7	9806670	GATGAATCTTCTCGTCCAAAAT	GACAAACTAAACAACATCCTTCTT	175	150	175
II	Msat2.17	10726715	GATTCCACCATATGTGGAT	CTTCGTCACTGCCAATAC	150	110	110
II	Msat2.9	18152579	TAAAAGAGTCCCTCGTAAAG	GTTGTTGTTGTGGCATT	175	150	170
III	Msat3.2	905503	AAGGTACGGCGGTGGATATTG	CGGGGATTTCTTCTTCCTGTG	150	175	150
III	Msat3.13	20386139	TTGTGTGTTTGCGATC	CATATCCGTTTTTATGTTTT	175	200	200
IV	nga8	5628813	GAGGGCAAATCTTTATTTCGG	TGGCTTTCGTTTATAAACATCC	250	300	250
IV	MSat4.35	7549254	CCCATGTCTCCGATGA	GGCGTTTAATTTAATTTGCATTCT	280	270	280
IV	JAERI-4	7768715	AGGAGAAACTTGCAACAGAA	CAACAAAGCTCTGCACAATA	150	200	150
IV	G-1311	9963075	GGTAATTTTCTTGGAGACCC	CTAACTAGATCGTCCCTCGT	140	150	140
IV	N-1200	18096262	GCGAAAAAACAAAAAAATCA	CGACGAATCGACAGAATTAGAGG	110	150	130
V	NGA151	4670058	GTTTTGGGAAGTTTTGCTGG	CAGTCTAAAAGCGAGAGTATGATG	750	750	750
V	Nga139	8326953	GGTTTCGTTTCACTATCCAGG	AGAGCTACCAGATCCGATGG	300	320	300
